# Supplementary material for: Deoxygenation of carbon dioxide by electrophilic terminal phosphinidene complexes
Source: Royal Society of Chemistry journal article supplement (doi:10.1039/c2sc21081a), 2012-01-01
Supplement: c2sc21081a.pdf [file c2sc21081a.pdf]

## Supporting Information

### Deoxygenation of carbon dioxide by electrophilic terminal phosphinidene complexes

Christian Schulten,<sup>a</sup> Gerd von Frantzius,<sup>a</sup> Gregor Schnakenburg,<sup>a</sup> Arturo Espinosa,<sup>b</sup> Rainer Streibel<sup>a\*</sup>

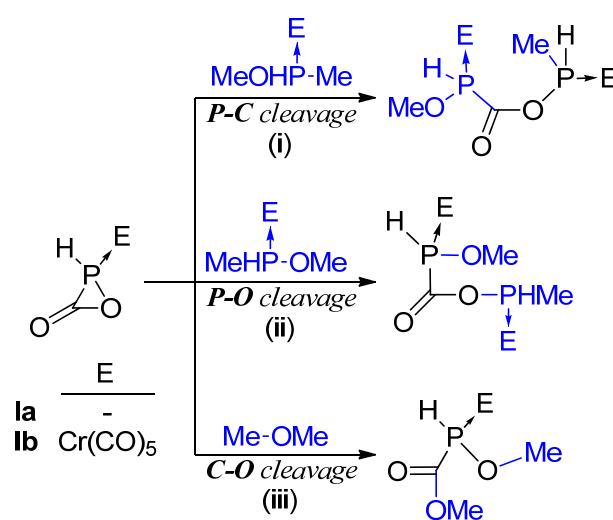

**Scheme SI 1.** Homodesmotic reactions used (as average) to evaluate RSE for compounds **la**, **b**.
